# Supplementary material for: lncRNA HHIP-AS1 Promotes the Osteogenic Differentiation Potential and Inhibits the Migration Ability of Periodontal Ligament Stem Cells
Source: Hindawi journal article supplement (doi:10.1155/2021/5595580), 2021-04-26
Supplement: f2 [file 5595580.f2.pdf]

**Supplementary Table 2. The differentially expressed mRNAs in HHIP-AS1-depleted PDLSCs.**

| <b>external gene name</b> | <b>log2FC</b> | <b>P value</b> | <b>FDR</b>  | <b>Style</b> | <b>gene biotype</b> |
|---------------------------|---------------|----------------|-------------|--------------|---------------------|
| TF                        | 8.10339       | 1.88E-10       | 7.19E-09    | up           | protein_coding      |
| LYZ                       | 7.87192       | 9.46E-10       | 3.31E-08    | up           | protein_coding      |
| AHSG                      | 7.62963       | 1.28E-09       | 4.37E-08    | up           | protein_coding      |
| ALB                       | 7.50654       | 7.42E-09       | 2.26E-07    | up           | protein_coding      |
| ITIH2                     | 7.22841       | 6.56E-08       | 1.66E-06    | up           | protein_coding      |
| APOH                      | 7.15778       | 1.35E-08       | 3.91E-07    | up           | protein_coding      |
| SERPINA1                  | 7.1035        | 5.63E-11       | 2.34E-09    | up           | protein_coding      |
| APOA2                     | 6.82945       | 9.16E-08       | 2.23E-06    | up           | protein_coding      |
| APOB                      | 6.67813       | 4.63E-22       | 5.58E-20    | up           | protein_coding      |
| APOA1                     | 6.56511       | 5.03E-07       | 1.07E-05    | up           | protein_coding      |
| FGA                       | 6.55842       | 2.56E-06       | 4.72E-05    | up           | protein_coding      |
| PGC                       | 6.0953        | 1.49E-05       | 0.000224721 | up           | protein_coding      |
| FGG                       | 5.93528       | 6.31E-05       | 0.000808704 | up           | protein_coding      |
| AGT                       | 5.71486       | 3.57E-05       | 0.00049193  | up           | protein_coding      |
| AMBP                      | 5.4264        | 3.23E-06       | 5.86E-05    | up           | protein_coding      |
| SERPINF2                  | 5.32625       | 0.000159978    | 0.001791279 | up           | protein_coding      |
| PTGIS                     | 4.96258       | 3.04E-224      | 4.58E-220   | up           | protein_coding      |
| COL21A1                   | 4.67585       | 4.79E-09       | 1.50E-07    | up           | protein_coding      |
| ADH1B                     | 4.62265       | 2.53E-37       | 7.06E-35    | up           | protein_coding      |
| SPP1                      | 4.54333       | 6.68E-06       | 0.000111952 | up           | protein_coding      |
| NR0B1                     | 4.47045       | 1.27E-17       | 1.08E-15    | up           | protein_coding      |
| AFP                       | 4.469         | 2.07E-13       | 1.18E-11    | up           | protein_coding      |
| KIF26B                    | 4.36285       | 2.56E-64       | 3.22E-61    | up           | protein_coding      |
| EPHA3                     | 4.35947       | 2.07E-22       | 2.58E-20    | up           | protein_coding      |
| ROR2                      | 4.20943       | 4.99E-38       | 1.50E-35    | up           | protein_coding      |
| ADH1C                     | 4.16089       | 0.000923083    | 0.007907643 | up           | protein_coding      |
| RASL12                    | 4.15169       | 0.000109802    | 0.001290013 | up           | protein_coding      |
| ERVMER34-1                | 4.01765       | 0.00177526     | 0.013535088 | up           | protein_coding      |
| GPC3                      | 3.97292       | 0.000253096    | 0.002641455 | up           | protein_coding      |
| ALPL                      | 3.90592       | 0.004158874    | 0.026766084 | up           | protein_coding      |
| A2M                       | 3.81852       | 9.13E-05       | 0.001114109 | up           | protein_coding      |
| CXCL12                    | 3.80744       | 2.34E-15       | 1.67E-13    | up           | protein_coding      |
| BMP6                      | 3.80045       | 0.000441273    | 0.00424637  | up           | protein_coding      |
| RELN                      | 3.71344       | 9.67E-05       | 0.001163035 | up           | protein_coding      |
| STEAP4                    | 3.66243       | 4.36E-09       | 1.37E-07    | up           | protein_coding      |
| MMP28                     | 3.64173       | 1.57E-06       | 3.03E-05    | up           | protein_coding      |
| GMNC                      | 3.61217       | 0.000263356    | 0.002733388 | up           | protein_coding      |
| MOB3B                     | 3.60223       | 0.001529682    | 0.011973497 | up           | protein_coding      |
| GCNT3                     | 3.4917        | 4.53E-12       | 2.16E-10    | up           | protein_coding      |
| LAMP3                     | 3.36481       | 0.000182151    | 0.001996501 | up           | protein_coding      |
| ADGRD1                    | 3.30157       | 0.001565285    | 0.012195132 | up           | protein_coding      |
| PDGFD                     | 3.11519       | 1.57E-22       | 1.98E-20    | up           | protein_coding      |
| COL11A1                   | 3.10689       | 4.45E-104      | 1.34E-100   | up           | protein_coding      |
| OLFML2A                   | 3.10256       | 6.25E-28       | 1.19E-25    | up           | protein_coding      |
| NANOS1                    | 3.09904       | 5.75E-17       | 4.66E-15    | up           | protein_coding      |
| RASL11B                   | 3.07891       | 1.27E-06       | 2.50E-05    | up           | protein_coding      |
| IL16                      | 3.03323       | 4.30E-16       | 3.23E-14    | up           | protein_coding      |
| ABCA13                    | 3.01587       | 1.43E-15       | 1.04E-13    | up           | protein_coding      |
| PPARGC1A                  | 3.00621       | 2.24E-19       | 2.25E-17    | up           | protein_coding      |
| ST8SIA4                   | 2.99644       | 4.90E-09       | 1.53E-07    | up           | protein_coding      |
| FER1L6                    | 2.98502       | 5.10E-47       | 2.40E-44    | up           | protein_coding      |
| RGCC                      | 2.90002       | 5.37E-43       | 2.07E-40    | up           | protein_coding      |
| MLXIPL                    | 2.8876        | 0.003452722    | 0.023149927 | up           | protein_coding      |
| ERBB3                     | 2.84709       | 0.000915141    | 0.007853005 | up           | protein_coding      |
| PLXDC1                    | 2.84068       | 0.001122921    | 0.009307205 | up           | protein_coding      |
| SEL1L3                    | 2.82079       | 3.53E-06       | 6.33E-05    | up           | protein_coding      |
| ABCC6                     | 2.79914       | 9.49E-05       | 0.001147723 | up           | protein_coding      |
| GNAL                      | 2.79197       | 8.64E-06       | 0.000141642 | up           | protein_coding      |
| RASD1                     | 2.77926       | 2.12E-09       | 6.93E-08    | up           | protein_coding      |
| FAM107A                   | 2.73823       | 2.95E-38       | 9.07E-36    | up           | protein_coding      |
| ACKR2                     | 2.73157       | 0.000195614    | 0.002119775 | up           | protein_coding      |
| IDO1                      | 2.72508       | 1.76E-06       | 3.36E-05    | up           | protein_coding      |
| SNCAIP                    | 2.72034       | 4.42E-06       | 7.73E-05    | up           | protein_coding      |
| RBP4                      | 2.69863       | 0.001139172    | 0.009421155 | up           | protein_coding      |

|          |         |             |             |    |                |
|----------|---------|-------------|-------------|----|----------------|
| ALDH3A1  | 2.65759 | 3.88E-17    | 3.20E-15    | up | protein_coding |
| SEMA4A   | 2.63277 | 0.001250178 | 0.010155165 | up | protein_coding |
| GBP4     | 2.62393 | 0.0017184   | 0.013207778 | up | protein_coding |
| KMO      | 2.59028 | 2.56E-05    | 0.000368284 | up | protein_coding |
| PTPRO    | 2.59021 | 1.03E-05    | 0.000165638 | up | protein_coding |
| LBH      | 2.57671 | 5.75E-09    | 1.78E-07    | up | protein_coding |
| FNDC1    | 2.53682 | 0.00041065  | 0.004002836 | up | protein_coding |
| FPR1     | 2.52632 | 0.002065491 | 0.015255664 | up | protein_coding |
| COL5A3   | 2.50847 | 7.82E-56    | 6.54E-53    | up | protein_coding |
| DAAM2    | 2.48868 | 1.32E-37    | 3.74E-35    | up | protein_coding |
| NDST3    | 2.48475 | 0.002399485 | 0.017281802 | up | protein_coding |
| MTUS1    | 2.46184 | 3.82E-11    | 1.62E-09    | up | protein_coding |
| ACKR3    | 2.44167 | 0.000120822 | 0.001399671 | up | protein_coding |
| PHKG1    | 2.3885  | 0.001634185 | 0.01267946  | up | protein_coding |
| SPON1    | 2.37757 | 2.80E-40    | 2.36E-38    | up | protein_coding |
| KLHL41   | 2.3542  | 0.000174878 | 0.001935097 | up | protein_coding |
| COL3A1   | 2.34093 | 7.07E-173   | 5.32E-169   | up | protein_coding |
| SCARA5   | 2.33923 | 0.001139977 | 0.009422646 | up | protein_coding |
| C2       | 2.3392  | 0.003293328 | 0.022331168 | up | protein_coding |
| CES3     | 2.32807 | 0.001595584 | 0.012411929 | up | protein_coding |
| B3GALT4  | 2.3047  | 1.02E-08    | 3.03E-07    | up | protein_coding |
| SLITRK1  | 2.29301 | 0.000988106 | 0.008342467 | up | protein_coding |
| FHDC1    | 2.28659 | 4.12E-07    | 8.89E-06    | up | protein_coding |
| PPL      | 2.25887 | 1.61E-19    | 1.65E-17    | up | protein_coding |
| TMEM155  | 2.23775 | 6.82E-05    | 0.000866354 | up | protein_coding |
| COL14A1  | 2.23078 | 1.40E-27    | 2.60E-25    | up | protein_coding |
| SNED1    | 2.22311 | 2.83E-121   | 1.07E-117   | up | protein_coding |
| FAM160A1 | 2.22165 | 4.59E-14    | 2.80E-12    | up | protein_coding |
| RGMA     | 2.21106 | 1.33E-09    | 4.53E-08    | up | protein_coding |
| TSPAN11  | 2.1971  | 2.66E-08    | 7.29E-07    | up | protein_coding |
| LRP5     | 2.18718 | 7.52E-50    | 4.36E-47    | up | protein_coding |
| DDIT4L   | 2.1846  | 0.004918896 | 0.030789102 | up | protein_coding |
| GLDN     | 2.15708 | 1.86E-09    | 6.15E-08    | up | protein_coding |
| SLC1A3   | 2.14695 | 5.23E-43    | 2.07E-40    | up | protein_coding |
| CRISPLD1 | 2.13162 | 5.66E-20    | 6.05E-18    | up | protein_coding |
| AOC3     | 2.11257 | 0.001146756 | 0.009459241 | up | protein_coding |
| MYO3B    | 2.1118  | 6.04E-08    | 1.54E-06    | up | protein_coding |
| NDUFA4L2 | 2.10431 | 0.00316831  | 0.021639341 | up | protein_coding |
| ITGB8    | 2.10081 | 1.98E-07    | 4.58E-06    | up | protein_coding |
| EYA1     | 2.09842 | 3.38E-24    | 5.20E-22    | up | protein_coding |
| GFAP     | 2.07735 | 0.000922883 | 0.007907643 | up | protein_coding |
| C1R      | 2.07215 | 1.43E-80    | 3.58E-77    | up | protein_coding |
| CH25H    | 2.06876 | 0.0089387   | 0.049765923 | up | protein_coding |
| MRO      | 2.05387 | 1.13E-13    | 6.51E-12    | up | protein_coding |
| PENK     | 2.05104 | 8.72E-72    | 1.46E-68    | up | protein_coding |
| CMKLR1   | 2.04261 | 1.23E-15    | 9.01E-14    | up | protein_coding |
| CYP26B1  | 2.03485 | 1.04E-14    | 6.88E-13    | up | protein_coding |
| VSTM2L   | 2.02829 | 5.95E-13    | 3.25E-11    | up | protein_coding |
| INHBB    | 2.01436 | 0.005006173 | 0.03123155  | up | protein_coding |
| FOS      | 2.00491 | 5.82E-06    | 9.86E-05    | up | protein_coding |
| CHST6    | 2.00409 | 1.19E-05    | 0.000186302 | up | protein_coding |
| LRP1B    | 1.99324 | 1.06E-05    | 0.000168731 | up | protein_coding |
| CYP39A1  | 1.97722 | 0.000108913 | 0.001282512 | up | protein_coding |
| GUCY1A3  | 1.95709 | 0.00330512  | 0.022383827 | up | protein_coding |
| RBM47    | 1.95423 | 0.008900725 | 0.04963814  | up | protein_coding |
| VSTM4    | 1.9341  | 1.27E-22    | 1.63E-20    | up | protein_coding |
| SLC7A11  | 1.91774 | 3.00E-16    | 2.28E-14    | up | protein_coding |
| MFAP4    | 1.90666 | 1.33E-25    | 2.15E-23    | up | protein_coding |
| PIR      | 1.89695 | 5.55E-14    | 3.34E-12    | up | protein_coding |
| FMO3     | 1.89059 | 0.003046206 | 0.020966753 | up | protein_coding |
| PRSS35   | 1.88306 | 0.001194293 | 0.009784262 | up | protein_coding |
| ZBTB16   | 1.8828  | 2.91E-26    | 5.04E-24    | up | protein_coding |
| FRMD4B   | 1.8787  | 1.12E-05    | 0.000176947 | up | protein_coding |
| PODNL1   | 1.8742  | 1.91E-08    | 5.41E-07    | up | protein_coding |
| PLLP     | 1.86816 | 0.000720646 | 0.00638032  | up | protein_coding |
| MAFB     | 1.85757 | 6.35E-06    | 0.000106916 | up | protein_coding |

|          |         |             |             |    |                |
|----------|---------|-------------|-------------|----|----------------|
| SOBP     | 1.83219 | 0.008376593 | 0.047247748 | up | protein_coding |
| RORB     | 1.82035 | 8.49E-36    | 2.24E-33    | up | protein_coding |
| TSC22D3  | 1.81993 | 1.33E-49    | 7.40E-47    | up | protein_coding |
| MEDAG    | 1.8066  | 0.005445111 | 0.033607942 | up | protein_coding |
| MUC1     | 1.79517 | 1.16E-05    | 0.000181804 | up | protein_coding |
| RIPK3    | 1.7856  | 0.000238623 | 0.002515844 | up | protein_coding |
| APOD     | 1.78051 | 1.46E-28    | 2.94E-26    | up | protein_coding |
| NTN1     | 1.7649  | 1.94E-07    | 4.51E-06    | up | protein_coding |
| PLSCR4   | 1.76355 | 2.59E-18    | 2.37E-16    | up | protein_coding |
| ABCC2    | 1.75023 | 0.000103442 | 0.001232462 | up | protein_coding |
| NHSL2    | 1.74854 | 1.03E-35    | 2.66E-33    | up | protein_coding |
| SORBS2   | 1.7346  | 1.53E-07    | 3.61E-06    | up | protein_coding |
| BMF      | 1.71617 | 0.008210193 | 0.046465803 | up | protein_coding |
| RNF144A  | 1.71448 | 1.57E-47    | 7.88E-45    | up | protein_coding |
| NETO1    | 1.71299 | 0.000680286 | 0.00609103  | up | protein_coding |
| IL20RB   | 1.71242 | 8.09E-05    | 0.001002255 | up | protein_coding |
| THRB     | 1.71182 | 4.26E-13    | 2.37E-11    | up | protein_coding |
| SELENOP  | 1.70614 | 2.79E-08    | 7.59E-07    | up | protein_coding |
| PTK2B    | 1.6991  | 3.79E-24    | 5.71E-22    | up | protein_coding |
| ITPRIPL1 | 1.69589 | 2.31E-11    | 1.00E-09    | up | protein_coding |
| PCDH18   | 1.69364 | 1.98E-63    | 2.30E-60    | up | protein_coding |
| ARHGAP28 | 1.69004 | 1.55E-16    | 1.20E-14    | up | protein_coding |
| TRIM16L  | 1.67085 | 1.25E-37    | 3.63E-35    | up | protein_coding |
| RAB27B   | 1.66019 | 1.37E-15    | 9.98E-14    | up | protein_coding |
| SLC6A15  | 1.64049 | 1.17E-39    | 3.75E-37    | up | protein_coding |
| MXRA5    | 1.63937 | 2.54E-35    | 6.48E-33    | up | protein_coding |
| RABL2A   | 1.63737 | 5.16E-06    | 8.87E-05    | up | protein_coding |
| EPHX1    | 1.62908 | 2.99E-58    | 2.65E-55    | up | protein_coding |
| PLEKHH2  | 1.62144 | 0.006080424 | 0.036643131 | up | protein_coding |
| ARHGAP26 | 1.61493 | 3.89E-19    | 3.78E-17    | up | protein_coding |
| FGF7     | 1.60806 | 3.52E-16    | 2.66E-14    | up | protein_coding |
| FAM198B  | 1.58922 | 0.000234326 | 0.002479939 | up | protein_coding |
| FAM84A   | 1.58127 | 2.32E-25    | 3.68E-23    | up | protein_coding |
| GAS1     | 1.57425 | 6.50E-76    | 1.40E-72    | up | protein_coding |
| TMEM51   | 1.56772 | 1.34E-07    | 3.20E-06    | up | protein_coding |
| A4GALT   | 1.56075 | 3.02E-26    | 5.17E-24    | up | protein_coding |
| RASSF2   | 1.53603 | 3.97E-08    | 1.05E-06    | up | protein_coding |
| WNT9A    | 1.53418 | 0.000179832 | 0.001978279 | up | protein_coding |
| HTRA3    | 1.52902 | 1.60E-09    | 5.42E-08    | up | protein_coding |
| EPHB3    | 1.52025 | 5.44E-05    | 0.000711542 | up | protein_coding |
| CYP19A1  | 1.51818 | 0.00030147  | 0.003080147 | up | protein_coding |
| GUCY1B3  | 1.51789 | 7.01E-13    | 3.76E-11    | up | protein_coding |
| LIPC     | 1.5164  | 0.007692426 | 0.044098949 | up | protein_coding |
| CCDC69   | 1.51539 | 2.25E-10    | 8.47E-09    | up | protein_coding |
| FMO4     | 1.5112  | 0.004693469 | 0.029587126 | up | protein_coding |
| IRX5     | 1.50078 | 8.81E-05    | 0.001080747 | up | protein_coding |
| CLCA2    | 1.50025 | 1.76E-08    | 5.04E-07    | up | protein_coding |
| IL1R1    | 1.50008 | 1.44E-59    | 1.44E-56    | up | protein_coding |
| PCSK9    | 1.4989  | 0.004244167 | 0.027152569 | up | protein_coding |
| SLC22A15 | 1.49603 | 2.44E-10    | 9.11E-09    | up | protein_coding |
| APOE     | 1.49524 | 0.000759635 | 0.006674507 | up | protein_coding |
| HMOX1    | 1.49489 | 9.31E-51    | 5.61E-48    | up | protein_coding |
| ADAMTS3  | 1.49005 | 2.51E-05    | 0.000361009 | up | protein_coding |
| STXBP6   | 1.48696 | 0.000172187 | 0.001912193 | up | protein_coding |
| SLC7A8   | 1.47809 | 5.83E-26    | 9.65E-24    | up | protein_coding |
| UNC5D    | 1.4722  | 2.19E-06    | 4.09E-05    | up | protein_coding |
| AKR1C1   | 1.4721  | 7.56E-29    | 1.56E-26    | up | protein_coding |
| RIPOR3   | 1.4668  | 2.41E-20    | 2.69E-18    | up | protein_coding |
| PDE4D    | 1.46629 | 2.47E-27    | 4.53E-25    | up | protein_coding |
| NNMT     | 1.46034 | 2.88E-38    | 9.05E-36    | up | protein_coding |
| CEBPD    | 1.45771 | 1.08E-41    | 3.97E-39    | up | protein_coding |
| IL1RN    | 1.45742 | 0.000707882 | 0.00630438  | up | protein_coding |
| NR4A2    | 1.45579 | 2.84E-06    | 5.20E-05    | up | protein_coding |
| ITGA11   | 1.44321 | 4.06E-06    | 7.19E-05    | up | protein_coding |
| ADAMTS9  | 1.4428  | 5.03E-07    | 1.07E-05    | up | protein_coding |
| AFF2     | 1.44039 | 0.000372941 | 0.003692634 | up | protein_coding |

|          |         |             |             |    |                |
|----------|---------|-------------|-------------|----|----------------|
| IGFBP7   | 1.43582 | 5.25E-35    | 1.32E-32    | up | protein_coding |
| SLC12A8  | 1.43092 | 1.02E-22    | 1.34E-20    | up | protein_coding |
| FKBP5    | 1.42884 | 1.02E-52    | 6.68E-50    | up | protein_coding |
| C5AR2    | 1.42801 | 3.57E-13    | 2.00E-11    | up | protein_coding |
| WDR31    | 1.42435 | 2.31E-06    | 4.29E-05    | up | protein_coding |
| SLC1A4   | 1.42308 | 0.00132324  | 0.010628264 | up | protein_coding |
| C1S      | 1.423   | 6.82E-49    | 3.67E-46    | up | protein_coding |
| STOM     | 1.41532 | 2.41E-51    | 1.51E-48    | up | protein_coding |
| KIAA1522 | 1.41255 | 7.97E-14    | 4.69E-12    | up | protein_coding |
| SLC25A27 | 1.41    | 0.007322077 | 0.042460716 | up | protein_coding |
| CRISPLD2 | 1.40903 | 4.54E-24    | 6.70E-22    | up | protein_coding |
| HRCT1    | 1.40694 | 0.002946307 | 0.020397779 | up | protein_coding |
| WISP2    | 1.39917 | 1.16E-06    | 2.29E-05    | up | protein_coding |
| C1QTNF6  | 1.39886 | 7.34E-15    | 4.89E-13    | up | protein_coding |
| METTL7A  | 1.39029 | 5.70E-34    | 1.34E-31    | up | protein_coding |
| MASP1    | 1.38395 | 7.95E-20    | 8.32E-18    | up | protein_coding |
| AKAP6    | 1.38255 | 0.002196441 | 0.016034127 | up | protein_coding |
| MSC      | 1.37784 | 8.61E-20    | 8.94E-18    | up | protein_coding |
| SLC46A3  | 1.37686 | 8.56E-07    | 1.74E-05    | up | protein_coding |
| OLFML2B  | 1.3735  | 5.23E-24    | 7.64E-22    | up | protein_coding |
| SLC6A9   | 1.36704 | 5.68E-07    | 1.20E-05    | up | protein_coding |
| PIM1     | 1.36617 | 1.48E-15    | 1.06E-13    | up | protein_coding |
| BOC      | 1.36359 | 9.28E-08    | 2.25E-06    | up | protein_coding |
| KYNU     | 1.3625  | 1.08E-26    | 1.91E-24    | up | protein_coding |
| PID1     | 1.36119 | 1.79E-13    | 1.03E-11    | up | protein_coding |
| VCAN     | 1.35275 | 1.32E-34    | 3.26E-32    | up | protein_coding |
| ENPP2    | 1.34793 | 5.14E-41    | 1.80E-38    | up | protein_coding |
| SLC14A1  | 1.34775 | 6.00E-42    | 2.26E-39    | up | protein_coding |
| OCA2     | 1.34544 | 0.00859274  | 0.048241364 | up | protein_coding |
| SERTAD4  | 1.34519 | 4.23E-05    | 0.0005714   | up | protein_coding |
| SOCS1    | 1.34397 | 0.002559347 | 0.018215392 | up | protein_coding |
| COL1A1   | 1.33725 | 1.99E-44    | 8.84E-42    | up | protein_coding |
| DIRAS3   | 1.32558 | 0.004703878 | 0.029636154 | up | protein_coding |
| IFITM1   | 1.32534 | 0.000248668 | 0.002602464 | up | protein_coding |
| TIMP4    | 1.32339 | 5.90E-14    | 3.54E-12    | up | protein_coding |
| SLC9A9   | 1.31961 | 6.21E-17    | 4.98E-15    | up | protein_coding |
| MBP      | 1.31737 | 0.000107145 | 0.001267554 | up | protein_coding |
| ACSL5    | 1.30737 | 0.005955473 | 0.036090134 | up | protein_coding |
| IGFBP5   | 1.30462 | 1.49E-05    | 0.000224721 | up | protein_coding |
| CORIN    | 1.3035  | 6.07E-05    | 0.000782361 | up | protein_coding |
| PDE3B    | 1.29146 | 0.000101072 | 0.001208045 | up | protein_coding |
| PCDH7    | 1.2888  | 9.08E-08    | 2.21E-06    | up | protein_coding |
| C1orf115 | 1.28079 | 0.002121485 | 0.015575527 | up | protein_coding |
| ST6GAL1  | 1.27957 | 5.66E-10    | 2.04E-08    | up | protein_coding |
| PDGFRB   | 1.27847 | 7.64E-30    | 1.64E-27    | up | protein_coding |
| FGF14    | 1.27133 | 0.000385199 | 0.003799019 | up | protein_coding |
| CLMN     | 1.27091 | 0.000749201 | 0.006602085 | up | protein_coding |
| HECTD2   | 1.25974 | 7.11E-05    | 0.000899495 | up | protein_coding |
| ACACB    | 1.25665 | 1.73E-06    | 3.31E-05    | up | protein_coding |
| COL4A2   | 1.24491 | 1.10E-27    | 2.07E-25    | up | protein_coding |
| ZNF493   | 1.24174 | 0.004974226 | 0.03107086  | up | protein_coding |
| EV12A    | 1.2351  | 0.000632178 | 0.005745687 | up | protein_coding |
| CYP27A1  | 1.23338 | 1.80E-14    | 1.16E-12    | up | protein_coding |
| MYO1D    | 1.23238 | 4.11E-09    | 1.29E-07    | up | protein_coding |
| SEC31B   | 1.23193 | 0.002013607 | 0.014938384 | up | protein_coding |
| DHRS12   | 1.2303  | 0.00457196  | 0.028954466 | up | protein_coding |
| SLC40A1  | 1.23013 | 0.00018886  | 0.002055084 | up | protein_coding |
| FOXO1    | 1.22921 | 6.10E-05    | 0.000786352 | up | protein_coding |
| LAMB3    | 1.2292  | 2.35E-07    | 5.31E-06    | up | protein_coding |
| CMPK2    | 1.22823 | 0.003561059 | 0.023740396 | up | protein_coding |
| ENPP1    | 1.2244  | 8.76E-18    | 7.71E-16    | up | protein_coding |
| PLA2R1   | 1.22044 | 3.91E-06    | 6.94E-05    | up | protein_coding |
| IMPA2    | 1.22043 | 0.001516716 | 0.011896741 | up | protein_coding |
| PCDH10   | 1.21926 | 6.73E-07    | 1.39E-05    | up | protein_coding |
| EMILIN2  | 1.21896 | 4.01E-10    | 1.47E-08    | up | protein_coding |
| PLCD4    | 1.21817 | 2.24E-10    | 8.46E-09    | up | protein_coding |

|          |         |             |             |    |                |
|----------|---------|-------------|-------------|----|----------------|
| FAM129A  | 1.21343 | 9.80E-22    | 1.16E-19    | up | protein_coding |
| PTGFR    | 1.21204 | 8.84E-18    | 7.74E-16    | up | protein_coding |
| KSR1     | 1.21203 | 4.09E-08    | 1.08E-06    | up | protein_coding |
| TMEM100  | 1.20836 | 0.000710853 | 0.006319624 | up | protein_coding |
| PAPLN    | 1.20784 | 2.77E-06    | 5.08E-05    | up | protein_coding |
| ITPKB    | 1.20443 | 7.22E-06    | 0.00012036  | up | protein_coding |
| JAG1     | 1.20011 | 1.14E-20    | 1.29E-18    | up | protein_coding |
| TCEA3    | 1.19406 | 0.000171726 | 0.001908635 | up | protein_coding |
| ANGPTL2  | 1.19292 | 2.30E-16    | 1.77E-14    | up | protein_coding |
| PPM1H    | 1.18723 | 1.63E-09    | 5.49E-08    | up | protein_coding |
| EYA2     | 1.18008 | 1.33E-18    | 1.25E-16    | up | protein_coding |
| SHTN1    | 1.17973 | 0.000641189 | 0.005813547 | up | protein_coding |
| MFSD7    | 1.17856 | 0.004769172 | 0.029951515 | up | protein_coding |
| ADAMTS2  | 1.17231 | 3.95E-33    | 9.02E-31    | up | protein_coding |
| EFEMP1   | 1.16936 | 1.21E-08    | 3.55E-07    | up | protein_coding |
| ALDH3A2  | 1.16767 | 8.97E-18    | 7.76E-16    | up | protein_coding |
| VWA5A    | 1.16761 | 1.30E-16    | 1.02E-14    | up | protein_coding |
| DTX4     | 1.16142 | 1.83E-05    | 0.000270198 | up | protein_coding |
| CMTM8    | 1.16046 | 1.33E-05    | 0.000203999 | up | protein_coding |
| EEPD1    | 1.15951 | 7.31E-05    | 0.000919308 | up | protein_coding |
| IFIT1    | 1.15654 | 0.002559269 | 0.018215392 | up | protein_coding |
| PIK3C2B  | 1.15102 | 4.44E-08    | 1.17E-06    | up | protein_coding |
| TGFB3    | 1.1462  | 0.001693604 | 0.013073128 | up | protein_coding |
| LRRC75A  | 1.14611 | 0.003100069 | 0.021260994 | up | protein_coding |
| SLC22A23 | 1.14451 | 1.15E-05    | 0.00018154  | up | protein_coding |
| PAN2     | 1.14296 | 2.39E-12    | 1.19E-10    | up | protein_coding |
| C1RL     | 1.12956 | 3.32E-14    | 2.08E-12    | up | protein_coding |
| PPP1R3E  | 1.12892 | 0.000579554 | 0.005341546 | up | protein_coding |
| STAT5A   | 1.12623 | 1.61E-12    | 8.21E-11    | up | protein_coding |
| DPYD     | 1.12538 | 2.02E-14    | 1.29E-12    | up | protein_coding |
| CORO6    | 1.12274 | 2.51E-07    | 5.64E-06    | up | protein_coding |
| MYLIP    | 1.12223 | 2.24E-07    | 5.07E-06    | up | protein_coding |
| TSPAN9   | 1.12157 | 5.61E-16    | 4.14E-14    | up | protein_coding |
| THBS2    | 1.11873 | 1.80E-25    | 2.88E-23    | up | protein_coding |
| ADAMTS15 | 1.11644 | 5.66E-12    | 2.65E-10    | up | protein_coding |
| PER3     | 1.11417 | 3.52E-05    | 0.000486947 | up | protein_coding |
| COL6A3   | 1.11226 | 1.90E-34    | 4.62E-32    | up | protein_coding |
| LYRM9    | 1.11033 | 0.000242465 | 0.002549891 | up | protein_coding |
| SCART1   | 1.10853 | 0.006644085 | 0.039285402 | up | protein_coding |
| ABCC3    | 1.09874 | 3.66E-12    | 1.78E-10    | up | protein_coding |
| HRH1     | 1.09766 | 8.11E-08    | 2.02E-06    | up | protein_coding |
| USP13    | 1.0951  | 3.23E-28    | 6.39E-26    | up | protein_coding |
| PTPRU    | 1.09464 | 2.51E-09    | 8.08E-08    | up | protein_coding |
| EDNRA    | 1.0942  | 0.000756537 | 0.006655049 | up | protein_coding |
| SAMHD1   | 1.09385 | 4.95E-23    | 6.71E-21    | up | protein_coding |
| STRADA   | 1.09247 | 0.006465157 | 0.038438712 | up | protein_coding |
| SDC2     | 1.09165 | 8.07E-17    | 6.43E-15    | up | protein_coding |
| LRRN4CL  | 1.08761 | 6.02E-08    | 1.53E-06    | up | protein_coding |
| APOL1    | 1.08539 | 8.77E-08    | 2.15E-06    | up | protein_coding |
| DENND6B  | 1.08028 | 0.000710018 | 0.006319624 | up | protein_coding |
| FAM43A   | 1.07104 | 6.01E-13    | 3.27E-11    | up | protein_coding |
| FLRT3    | 1.06871 | 1.77E-07    | 4.15E-06    | up | protein_coding |
| COL4A1   | 1.06798 | 2.95E-20    | 3.24E-18    | up | protein_coding |
| TMC7     | 1.06449 | 0.00293716  | 0.020346655 | up | protein_coding |
| PLEKHF1  | 1.05994 | 2.20E-08    | 6.18E-07    | up | protein_coding |
| WNT2B    | 1.05796 | 2.90E-17    | 2.43E-15    | up | protein_coding |
| PAPPA    | 1.05779 | 1.30E-25    | 2.12E-23    | up | protein_coding |
| PIP      | 1.05639 | 7.73E-11    | 3.15E-09    | up | protein_coding |
| C16orf86 | 1.05614 | 0.004907597 | 0.030731146 | up | protein_coding |
| FZD5     | 1.05528 | 0.000621653 | 0.005673997 | up | protein_coding |
| ISM1     | 1.05521 | 3.49E-05    | 0.000482784 | up | protein_coding |
| TENM3    | 1.04488 | 5.25E-09    | 1.63E-07    | up | protein_coding |
| ARSG     | 1.0441  | 6.13E-07    | 1.28E-05    | up | protein_coding |
| PCBP3    | 1.04393 | 2.73E-14    | 1.72E-12    | up | protein_coding |
| STON1    | 1.04337 | 9.95E-10    | 3.47E-08    | up | protein_coding |
| PXK      | 1.04112 | 3.29E-20    | 3.59E-18    | up | protein_coding |

|           |         |             |             |      |                |
|-----------|---------|-------------|-------------|------|----------------|
| SPTLC3    | 1.04095 | 2.17E-07    | 4.96E-06    | up   | protein_coding |
| COL1A2    | 1.03687 | 5.29E-27    | 9.48E-25    | up   | protein_coding |
| COL12A1   | 1.03557 | 1.34E-24    | 2.10E-22    | up   | protein_coding |
| TBX4      | 1.03437 | 0.008951356 | 0.049817966 | up   | protein_coding |
| TRIM45    | 1.02801 | 0.003809765 | 0.024988128 | up   | protein_coding |
| RETREG1   | 1.02796 | 0.004595964 | 0.029082026 | up   | protein_coding |
| SPRY1     | 1.02788 | 1.69E-12    | 8.56E-11    | up   | protein_coding |
| PCDHGA10  | 1.02669 | 2.13E-11    | 9.29E-10    | up   | protein_coding |
| MN1       | 1.02527 | 3.26E-12    | 1.61E-10    | up   | protein_coding |
| LRP1      | 1.02514 | 1.14E-23    | 1.60E-21    | up   | protein_coding |
| LAMA1     | 1.02393 | 1.37E-20    | 1.55E-18    | up   | protein_coding |
| PELI2     | 1.02301 | 5.51E-11    | 2.29E-09    | up   | protein_coding |
| COL27A1   | 1.02166 | 6.24E-19    | 5.87E-17    | up   | protein_coding |
| ST3GAL5   | 1.02083 | 1.63E-10    | 6.29E-09    | up   | protein_coding |
| GLIS2     | 1.02079 | 4.14E-13    | 2.31E-11    | up   | protein_coding |
| GPC6      | 1.02074 | 1.11E-09    | 3.84E-08    | up   | protein_coding |
| COL4A5    | 1.02047 | 1.27E-09    | 4.37E-08    | up   | protein_coding |
| RRAD      | 1.0181  | 2.72E-08    | 7.41E-07    | up   | protein_coding |
| THEMIS2   | 1.01795 | 1.08E-08    | 3.20E-07    | up   | protein_coding |
| NCAM2     | 1.01757 | 0.00038266  | 0.00377645  | up   | protein_coding |
| KIAA1671  | 1.01731 | 4.53E-05    | 0.000607987 | up   | protein_coding |
| COL4A6    | 1.01275 | 3.68E-05    | 0.000504734 | up   | protein_coding |
| MMD       | 1.01231 | 8.96E-18    | 7.76E-16    | up   | protein_coding |
| LRP5L     | 1.01004 | 0.00517527  | 0.032153285 | up   | protein_coding |
| SLC39A8   | 1.00703 | 7.15E-14    | 4.27E-12    | up   | protein_coding |
| SLC48A1   | 1.00518 | 5.95E-10    | 2.14E-08    | up   | protein_coding |
| DCN       | 1.00267 | 5.66E-24    | 8.20E-22    | up   | protein_coding |
| STON2     | 1.00186 | 0.000157882 | 0.001769776 | up   | protein_coding |
| SLC37A2   | -1.0018 | 0.003445233 | 0.023120798 | down | protein_coding |
| HIST1H2AI | -1.0037 | 0.003606514 | 0.023948017 | down | protein_coding |
| UGCG      | -1.0055 | 9.96E-21    | 1.14E-18    | down | protein_coding |
| CRIM1     | -1.0068 | 4.14E-24    | 6.17E-22    | down | protein_coding |
| EGLN1     | -1.0081 | 3.01E-15    | 2.08E-13    | down | protein_coding |
| ATRNL1    | -1.0122 | 8.06E-05    | 0.000999841 | down | protein_coding |
| FAM162A   | -1.0123 | 1.56E-07    | 3.67E-06    | down | protein_coding |
| HIST1H2BO | -1.0135 | 1.55E-05    | 0.00023245  | down | protein_coding |
| FAM107B   | -1.0137 | 1.81E-14    | 1.16E-12    | down | protein_coding |
| AKAP12    | -1.0149 | 2.14E-09    | 6.98E-08    | down | protein_coding |
| PRAG1     | -1.0151 | 0.00024742  | 0.002592033 | down | protein_coding |
| FILIP1L   | -1.0177 | 0.000276709 | 0.002854271 | down | protein_coding |
| GADD45A   | -1.0198 | 3.39E-12    | 1.67E-10    | down | protein_coding |
| KPNA6     | -1.0198 | 2.02E-26    | 3.54E-24    | down | protein_coding |
| HCAR1     | -1.0224 | 0.000312092 | 0.003171461 | down | protein_coding |
| PEAR1     | -1.0249 | 6.36E-05    | 0.000815081 | down | protein_coding |
| SEC61A2   | -1.0251 | 0.00043301  | 0.004180214 | down | protein_coding |
| CDCA5     | -1.0274 | 1.56E-06    | 3.03E-05    | down | protein_coding |
| RELT      | -1.0278 | 0.001541585 | 0.012041635 | down | protein_coding |
| POU2F2    | -1.0286 | 5.05E-14    | 3.07E-12    | down | protein_coding |
| SH2D5     | -1.0298 | 0.003284674 | 0.022302614 | down | protein_coding |
| CDC6      | -1.0324 | 0.000558118 | 0.005188427 | down | protein_coding |
| SMTN      | -1.034  | 2.96E-24    | 4.60E-22    | down | protein_coding |
| BIRC3     | -1.0357 | 8.93E-06    | 0.000145575 | down | protein_coding |
| TMEM160   | -1.0374 | 0.001978254 | 0.01470509  | down | protein_coding |
| MYPN      | -1.0384 | 6.77E-15    | 4.55E-13    | down | protein_coding |
| FOXD1     | -1.0399 | 1.32E-16    | 1.02E-14    | down | protein_coding |
| CDC25A    | -1.05   | 2.30E-05    | 0.000334045 | down | protein_coding |
| NFKBIZ    | -1.0506 | 1.08E-14    | 7.10E-13    | down | protein_coding |
| CDCA7     | -1.0525 | 0.000181729 | 0.001993333 | down | protein_coding |
| HIST1H2BH | -1.0544 | 0.000199213 | 0.002150648 | down | protein_coding |
| EPOP      | -1.0572 | 0.000672312 | 0.00603039  | down | protein_coding |
| PM20D2    | -1.0632 | 2.17E-06    | 4.06E-05    | down | protein_coding |
| PLD5      | -1.0632 | 0.008189144 | 0.046381539 | down | protein_coding |
| C6orf132  | -1.066  | 1.61E-08    | 4.63E-07    | down | protein_coding |
| SLC43A2   | -1.0667 | 1.76E-06    | 3.35E-05    | down | protein_coding |
| SPRY2     | -1.0672 | 3.76E-24    | 5.71E-22    | down | protein_coding |
| SPHK1     | -1.0735 | 6.88E-07    | 1.42E-05    | down | protein_coding |

|           |         |             |             |      |                |
|-----------|---------|-------------|-------------|------|----------------|
| CARD10    | -1.0736 | 5.30E-05    | 0.000696398 | down | protein_coding |
| CCND1     | -1.0742 | 9.68E-41    | 3.31E-38    | down | protein_coding |
| APAF1     | -1.0763 | 3.82E-11    | 1.62E-09    | down | protein_coding |
| PPP1R13B  | -1.0804 | 0.007093222 | 0.041436741 | down | protein_coding |
| SHCBP1    | -1.0852 | 2.59E-06    | 4.77E-05    | down | protein_coding |
| HIST1H3H  | -1.0864 | 0.000117548 | 0.001367012 | down | protein_coding |
| NF2       | -1.0893 | 1.26E-29    | 2.68E-27    | down | protein_coding |
| TNFSF4    | -1.0899 | 0.003106223 | 0.021282856 | down | protein_coding |
| HMMR      | -1.0902 | 0.001913366 | 0.014335968 | down | protein_coding |
| UAP1      | -1.0907 | 4.18E-17    | 3.40E-15    | down | protein_coding |
| KIAA1549L | -1.0908 | 1.82E-14    | 1.17E-12    | down | protein_coding |
| HIST1H1B  | -1.0944 | 4.86E-10    | 1.76E-08    | down | protein_coding |
| HIST1H3G  | -1.102  | 2.13E-07    | 4.89E-06    | down | protein_coding |
| RASA2     | -1.1037 | 1.41E-10    | 5.47E-09    | down | protein_coding |
| RNF122    | -1.1039 | 0.00598738  | 0.036256511 | down | protein_coding |
| ARHGAP39  | -1.1123 | 0.00020343  | 0.002193029 | down | protein_coding |
| HIST1H2AB | -1.1132 | 0.003748759 | 0.024653412 | down | protein_coding |
| SEMA6D    | -1.1136 | 0.000188704 | 0.002055084 | down | protein_coding |
| DPYSL4    | -1.1163 | 2.06E-07    | 4.74E-06    | down | protein_coding |
| CNNM1     | -1.1217 | 0.007648922 | 0.043922441 | down | protein_coding |
| ORC6      | -1.1237 | 0.001269205 | 0.01028753  | down | protein_coding |
| INPP4B    | -1.1321 | 4.05E-07    | 8.77E-06    | down | protein_coding |
| DUSP6     | -1.1331 | 2.54E-34    | 6.08E-32    | down | protein_coding |
| MOK       | -1.1397 | 8.17E-13    | 4.30E-11    | down | protein_coding |
| FOXG1     | -1.1438 | 0.008898737 | 0.04963814  | down | protein_coding |
| MAD2L1    | -1.1486 | 6.18E-08    | 1.57E-06    | down | protein_coding |
| IKZF2     | -1.1578 | 3.36E-06    | 6.06E-05    | down | protein_coding |
| PFKFB4    | -1.1618 | 2.55E-19    | 2.52E-17    | down | protein_coding |
| ABAT      | -1.1651 | 8.38E-08    | 2.07E-06    | down | protein_coding |
| PLCB4     | -1.171  | 9.94E-15    | 6.59E-13    | down | protein_coding |
| EXO1      | -1.1781 | 0.00270912  | 0.019118723 | down | protein_coding |
| ZNF185    | -1.1788 | 2.99E-13    | 1.70E-11    | down | protein_coding |
| ADRB2     | -1.1853 | 1.88E-08    | 5.35E-07    | down | protein_coding |
| VLDLR     | -1.1882 | 3.65E-08    | 9.72E-07    | down | protein_coding |
| WNK3      | -1.1899 | 0.001738005 | 0.013313508 | down | protein_coding |
| EHF       | -1.193  | 0.008384254 | 0.047273254 | down | protein_coding |
| GYS1      | -1.2032 | 1.43E-29    | 2.98E-27    | down | protein_coding |
| HSPE1     | -1.2075 | 1.55E-05    | 0.000232216 | down | protein_coding |
| RGMB      | -1.2167 | 2.74E-54    | 1.96E-51    | down | protein_coding |
| TICRR     | -1.2169 | 9.68E-05    | 0.001163035 | down | protein_coding |
| KCTD12    | -1.2197 | 1.17E-32    | 2.63E-30    | down | protein_coding |
| RBM38     | -1.224  | 1.44E-06    | 2.80E-05    | down | protein_coding |
| VEGFC     | -1.2279 | 2.62E-20    | 2.90E-18    | down | protein_coding |
| TES       | -1.2404 | 1.45E-06    | 2.83E-05    | down | protein_coding |
| MYBL1     | -1.2492 | 0.000104321 | 0.00124195  | down | protein_coding |
| IL7R      | -1.2529 | 2.44E-09    | 7.90E-08    | down | protein_coding |
| HCLS1     | -1.2658 | 0.000149054 | 0.001683987 | down | protein_coding |
| MPP2      | -1.2663 | 9.72E-07    | 1.95E-05    | down | protein_coding |
| HIST1H2BM | -1.2685 | 0.001647033 | 0.012765988 | down | protein_coding |
| ACPP      | -1.269  | 7.66E-06    | 0.000126701 | down | protein_coding |
| PSG5      | -1.2692 | 3.49E-08    | 9.36E-07    | down | protein_coding |
| KCNJ2     | -1.2703 | 3.61E-08    | 9.61E-07    | down | protein_coding |
| AMPD3     | -1.2737 | 1.67E-23    | 2.31E-21    | down | protein_coding |
| CXCL1     | -1.2865 | 0.000465932 | 0.004438288 | down | protein_coding |
| NES       | -1.2899 | 5.51E-26    | 9.21E-24    | down | protein_coding |
| NDN       | -1.2931 | 0.000125804 | 0.001454036 | down | protein_coding |
| ZC3HAV1L  | -1.2954 | 5.76E-07    | 1.21E-05    | down | protein_coding |
| DOK5      | -1.3129 | 1.70E-09    | 5.70E-08    | down | protein_coding |
| MFSD2B    | -1.3145 | 0.000930257 | 0.007960036 | down | protein_coding |
| SLC4A7    | -1.3151 | 1.83E-23    | 2.50E-21    | down | protein_coding |
| IL12A     | -1.3203 | 0.000992867 | 0.008372104 | down | protein_coding |
| KCTD4     | -1.3204 | 1.99E-05    | 0.000292903 | down | protein_coding |
| ADGRG1    | -1.3232 | 1.30E-05    | 0.000200679 | down | protein_coding |
| ANKRD37   | -1.3339 | 0.002293147 | 0.016635255 | down | protein_coding |
| EDN1      | -1.3379 | 0.001616008 | 0.012556129 | down | protein_coding |
| NRG1      | -1.3402 | 6.47E-24    | 9.28E-22    | down | protein_coding |

|            |         |             |             |      |                |
|------------|---------|-------------|-------------|------|----------------|
| HIST1H3J   | -1.347  | 6.27E-05    | 0.000804908 | down | protein_coding |
| MT2A       | -1.3472 | 2.09E-43    | 8.51E-41    | down | protein_coding |
| HIST1H4L   | -1.3492 | 0.002405849 | 0.017311074 | down | protein_coding |
| NPDC1      | -1.351  | 1.15E-11    | 5.20E-10    | down | protein_coding |
| BTBD11     | -1.3536 | 0.001854169 | 0.013975867 | down | protein_coding |
| SLC4A4     | -1.3628 | 4.40E-12    | 2.11E-10    | down | protein_coding |
| WNT16      | -1.3737 | 1.54E-12    | 7.85E-11    | down | protein_coding |
| CLDN1      | -1.3903 | 0.006378333 | 0.03802759  | down | protein_coding |
| MYEOV      | -1.399  | 2.97E-05    | 0.000419721 | down | protein_coding |
| PDK1       | -1.4167 | 1.81E-22    | 2.28E-20    | down | protein_coding |
| CORO1A     | -1.4171 | 0.007244619 | 0.04212508  | down | protein_coding |
| ARHGAP29   | -1.4216 | 5.46E-20    | 5.87E-18    | down | protein_coding |
| BNIP3      | -1.4226 | 8.86E-48    | 4.60E-45    | down | protein_coding |
| PPP1R3C    | -1.4254 | 6.66E-45    | 3.04E-42    | down | protein_coding |
| P3H2       | -1.4543 | 0.001275179 | 0.010313745 | down | protein_coding |
| AK4        | -1.4661 | 1.32E-36    | 3.60E-34    | down | protein_coding |
| PRKCZ      | -1.4779 | 0.000165685 | 0.001851053 | down | protein_coding |
| PDCD1LG2   | -1.484  | 2.17E-18    | 1.99E-16    | down | protein_coding |
| DDIAS      | -1.4894 | 0.000536221 | 0.005018946 | down | protein_coding |
| FGF5       | -1.4936 | 4.32E-44    | 1.81E-41    | down | protein_coding |
| PSD        | -1.4959 | 0.00746325  | 0.043113366 | down | protein_coding |
| GINS2      | -1.5049 | 3.06E-06    | 5.58E-05    | down | protein_coding |
| NRK        | -1.5051 | 8.50E-05    | 0.001047567 | down | protein_coding |
| RP1        | -1.5058 | 0.000144756 | 0.00164158  | down | protein_coding |
| SLC2A1     | -1.5068 | 6.10E-34    | 1.41E-31    | down | protein_coding |
| MMP1       | -1.5075 | 2.73E-58    | 2.57E-55    | down | protein_coding |
| HIST2H3D   | -1.5085 | 0.000773004 | 0.00678406  | down | protein_coding |
| HBEGF      | -1.5163 | 2.77E-08    | 7.54E-07    | down | protein_coding |
| EEF1A2     | -1.5417 | 0.000257287 | 0.002677779 | down | protein_coding |
| IL13RA2    | -1.5473 | 1.68E-05    | 0.000249288 | down | protein_coding |
| ANO7       | -1.5609 | 0.000505311 | 0.004768158 | down | protein_coding |
| GNAZ       | -1.5611 | 3.10E-05    | 0.000435377 | down | protein_coding |
| SMURF2     | -1.5676 | 1.25E-54    | 9.88E-52    | down | protein_coding |
| DCBLD2     | -1.5722 | 9.90E-53    | 6.68E-50    | down | protein_coding |
| ADAMTS1    | -1.5843 | 3.36E-47    | 1.63E-44    | down | protein_coding |
| BHLHE41    | -1.6419 | 0.003977622 | 0.025853685 | down | protein_coding |
| KCTD16     | -1.6423 | 0.002687733 | 0.018994489 | down | protein_coding |
| ANGPTL4    | -1.6484 | 3.65E-44    | 1.57E-41    | down | protein_coding |
| NEK10      | -1.6689 | 4.89E-08    | 1.27E-06    | down | protein_coding |
| CENPU      | -1.6967 | 0.002269817 | 0.016513743 | down | protein_coding |
| MARCKSL1   | -1.7509 | 7.03E-24    | 9.99E-22    | down | protein_coding |
| PLAT       | -1.7525 | 1.01E-39    | 3.32E-37    | down | protein_coding |
| STC1       | -1.7751 | 2.15E-62    | 2.31E-59    | down | protein_coding |
| AC106886.5 | -1.7818 | 0.003472703 | 0.023213007 | down | protein_coding |
| MCM10      | -1.7886 | 1.35E-05    | 0.000205985 | down | protein_coding |
| GPRC5A     | -1.8048 | 2.23E-08    | 6.23E-07    | down | protein_coding |
| PTPRN      | -1.8161 | 2.70E-11    | 1.16E-09    | down | protein_coding |
| ENC1       | -1.8894 | 1.56E-41    | 5.60E-39    | down | protein_coding |
| DHRS3      | -1.8945 | 1.25E-12    | 6.42E-11    | down | protein_coding |
| KIT        | -1.9252 | 4.46E-13    | 2.46E-11    | down | protein_coding |
| SYNPO2L    | -1.9323 | 0.000208077 | 0.002236716 | down | protein_coding |
| CCND2      | -1.94   | 1.88E-74    | 3.54E-71    | down | protein_coding |
| CXCL3      | -1.9527 | 1.34E-19    | 1.39E-17    | down | protein_coding |
| KRTAP1-1   | -1.9765 | 2.45E-09    | 7.91E-08    | down | protein_coding |
| LIF        | -2.0172 | 2.54E-54    | 1.92E-51    | down | protein_coding |
| NPTX1      | -2.0482 | 2.44E-68    | 3.67E-65    | down | protein_coding |
| KRT19      | -2.0815 | 2.25E-05    | 0.000327268 | down | protein_coding |
| RAB20      | -2.1555 | 5.23E-05    | 0.000687895 | down | protein_coding |
| PRKG2      | -2.1625 | 6.34E-11    | 2.62E-09    | down | protein_coding |
| KRT34      | -2.1764 | 1.00E-28    | 2.04E-26    | down | protein_coding |
| SHISA2     | -2.2001 | 7.45E-07    | 1.53E-05    | down | protein_coding |
| CORO2B     | -2.2039 | 0.004838494 | 0.030348904 | down | protein_coding |
| CXCL8      | -2.2203 | 1.24E-65    | 1.69E-62    | down | protein_coding |
| PPFIA4     | -2.2936 | 5.74E-08    | 1.47E-06    | down | protein_coding |
| CEND1      | -2.428  | 4.55E-08    | 1.19E-06    | down | protein_coding |
| IL11       | -2.471  | 9.23E-05    | 0.001121944 | down | protein_coding |



|          |         |             |             |      |                |
|----------|---------|-------------|-------------|------|----------------|
| RAB39B   | -2.5786 | 0.002502387 | 0.017903063 | down | protein_coding |
| DOK3     | -2.6646 | 0.001298048 | 0.01045939  | down | protein_coding |
| SERPINB2 | -2.6696 | 3.48E-11    | 1.48E-09    | down | protein_coding |
| KRT15    | -2.8118 | 0.000728404 | 0.006437656 | down | protein_coding |
| CXCL5    | -2.8297 | 2.68E-31    | 5.93E-29    | down | protein_coding |
| GRIA1    | -2.8653 | 0.001742347 | 0.013339985 | down | protein_coding |
| PSG1     | -2.8888 | 0.003351627 | 0.022584119 | down | protein_coding |
| MGP      | -2.9122 | 0.007214037 | 0.041979672 | down | protein_coding |
| KRTAP1-5 | -2.9365 | 7.99E-161   | 4.01E-157   | down | protein_coding |
| OLAH     | -2.9776 | 4.21E-05    | 0.000569073 | down | protein_coding |
| GPR146   | -3.0398 | 0.000129807 | 0.001498005 | down | protein_coding |
| KRTAP2-3 | -3.3272 | 7.19E-13    | 3.83E-11    | down | protein_coding |
| FBXL16   | -3.5056 | 6.45E-05    | 0.000822021 | down | protein_coding |
| TTN      | -3.5713 | 5.98E-05    | 0.000772254 | down | protein_coding |
| KPRP     | -4.0641 | 3.64E-14    | 2.25E-12    | down | protein_coding |
