# Supplementary material for: lncRNA HHIP-AS1 Promotes the Osteogenic Differentiation Potential and Inhibits the Migration Ability of Periodontal Ligament Stem Cells
Source: Hindawi journal article supplement (doi:10.1155/2021/5595580), 2021-04-26

**a**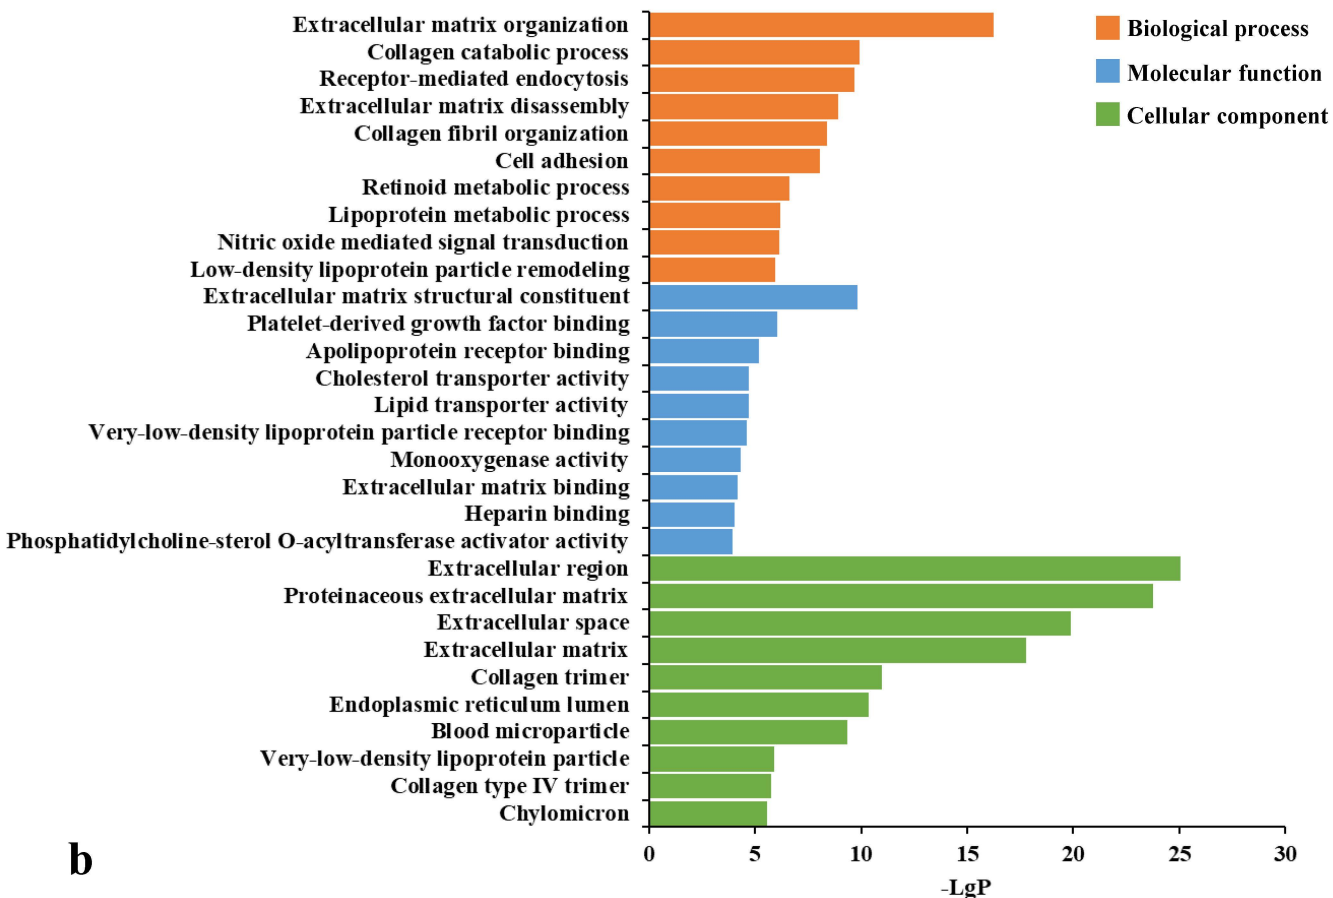**b**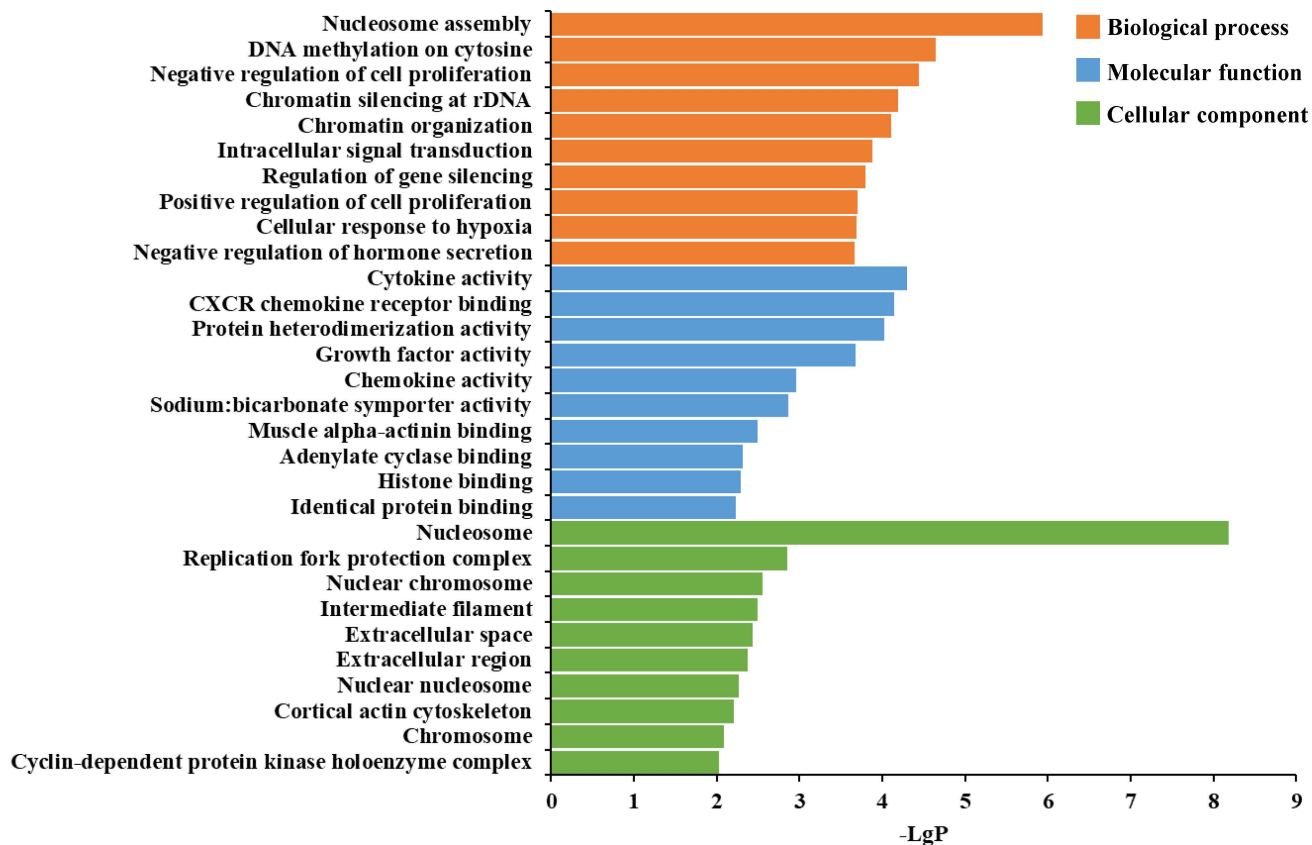

Supplement: f5 [file 5595580.f5.pdf]
