# Supplementary material for: lncRNA HHIP-AS1 Promotes the Osteogenic Differentiation Potential and Inhibits the Migration Ability of Periodontal Ligament Stem Cells
Source: Hindawi journal article supplement (doi:10.1155/2021/5595580), 2021-04-26
Supplement: f7 [file 5595580.f7.pdf]

Supplementary Table 5. The significant upregulated and downregulated pathways in HHIP-AS1-depleted PDLSCs.

| PathwayID  | PathwayTerm                                     | DifGene | AllDifGene | GeneInPathway | AllGene | P-Value  | FDR      | Enrichment  | (-log10P) | Style |
|------------|-------------------------------------------------|---------|------------|---------------|---------|----------|----------|-------------|-----------|-------|
| PATH:04512 | ECM-receptor interaction                        | 19      | 160        | 89            | 6719    | 1.34E-13 | 2.24E-11 | 8.964957865 | 12.874245 | up    |
| PATH:04974 | Protein digestion and absorption                | 15      | 160        | 89            | 6719    | 1.94E-09 | 1.63E-07 | 7.077598315 | 8.713029  | up    |
| PATH:05146 | Amoebiasis                                      | 15      | 160        | 109           | 6719    | 3.41E-08 | 1.91E-06 | 5.778956422 | 7.4667047 | up    |
| PATH:04510 | Focal adhesion                                  | 20      | 160        | 207           | 6719    | 7.68E-08 | 3.23E-06 | 4.05736715  | 7.1145597 | up    |
| PATH:04151 | PI3K-Akt signaling pathway                      | 22      | 160        | 346           | 6719    | 2.07E-05 | 0.000694 | 2.670122832 | 4.6850756 | up    |
| PATH:04610 | Complement and coagulation cascades             | 9       | 160        | 69            | 6719    | 3.28E-05 | 0.000918 | 5.477445652 | 4.4842141 | up    |
| PATH:04611 | Platelet activation                             | 10      | 160        | 131           | 6719    | 0.001075 | 0.025804 | 3.205629771 | 2.9685209 | up    |
| PATH:05150 | Staphylococcus aureus infection                 | 6       | 160        | 53            | 6719    | 0.001511 | 0.031727 | 4.754009434 | 2.8207891 | up    |
| PATH:05200 | Pathways in cancer                              | 17      | 160        | 330           | 6719    | 0.002095 | 0.039106 | 2.163314394 | 2.6788264 | up    |
| PATH:00410 | beta-Alanine metabolism                         | 4       | 160        | 30            | 6719    | 0.005237 | 0.087985 | 5.599166667 | 2.2809018 | up    |
| PATH:00120 | Primary bile acid biosynthesis                  | 3       | 160        | 17            | 6719    | 0.00705  | 0.107672 | 7.410661765 | 2.1518132 | up    |
| PATH:04020 | Calcium signaling pathway                       | 10      | 160        | 185           | 6719    | 0.012614 | 0.176597 | 2.269932432 | 1.899144  | up    |
| PATH:00380 | Tryptophan metabolism                           | 4       | 160        | 41            | 6719    | 0.015818 | 0.189817 | 4.09695122  | 1.8008464 | up    |
| PATH:00350 | Tyrosine metabolism                             | 4       | 160        | 41            | 6719    | 0.015818 | 0.189817 | 4.09695122  | 1.8008464 | up    |
| PATH:05222 | Small cell lung cancer                          | 6       | 160        | 89            | 6719    | 0.019019 | 0.198392 | 2.831039326 | 1.7208228 | up    |
| PATH:02010 | ABC transporters                                | 4       | 160        | 44            | 6719    | 0.020075 | 0.198392 | 3.817613636 | 1.697337  | up    |
| PATH:00071 | Fatty acid metabolism                           | 4       | 160        | 44            | 6719    | 0.020075 | 0.198392 | 3.817613636 | 1.697337  | up    |
| PATH:00982 | Drug metabolism - cytochrome P450               | 5       | 160        | 73            | 6719    | 0.029503 | 0.275365 | 2.876284247 | 1.5301284 | up    |
| PATH:05144 | Malaria                                         | 4       | 160        | 52            | 6719    | 0.034626 | 0.306169 | 3.230288462 | 1.460595  | up    |
| PATH:05205 | Proteoglycans in cancer                         | 10      | 160        | 225           | 6719    | 0.041834 | 0.333747 | 1.866388889 | 1.3784727 | up    |
| PATH:00980 | Metabolism of xenobiotics by cytochrome P450    | 5       | 160        | 81            | 6719    | 0.04334  | 0.333747 | 2.59220679  | 1.3631095 | up    |
| PATH:04340 | Hedgehog signaling pathway                      | 4       | 160        | 56            | 6719    | 0.043705 | 0.333747 | 2.999553571 | 1.3594697 | up    |
| PATH:05143 | African trypanosomiasis                         | 3       | 160        | 34            | 6719    | 0.046276 | 0.338014 | 3.705330882 | 1.3346463 | up    |
| PATH:00604 | Glycosphingolipid biosynthesis - ganglio series | 2       | 160        | 15            | 6719    | 0.048301 | 0.338105 | 5.599166667 | 1.3160464 | up    |
| PATH:05134 | Legionellosis                                   | 7       | 90         | 55            | 6719    | 7.36E-06 | 0.000828 | 9.501616162 | 5.1331333 | down  |
| PATH:05322 | Systemic lupus erythematosus                    | 10      | 90         | 134           | 6719    | 1.05E-05 | 0.000828 | 5.571310116 | 4.9793897 | down  |
| PATH:05202 | Transcriptional misregulation in cancer         | 11      | 90         | 180           | 6719    | 2.48E-05 | 0.001307 | 4.562283951 | 4.6052404 | down  |
| PATH:05034 | Alcoholism                                      | 10      | 90         | 179           | 6719    | 0.000127 | 0.005    | 4.170701428 | 3.8976271 | down  |
| PATH:04060 | Cytokine-cytokine receptor interaction          | 12      | 90         | 263           | 6719    | 0.000181 | 0.005712 | 3.406337136 | 3.7429293 | down  |
| PATH:04668 | TNF signaling pathway                           | 7       | 90         | 110           | 6719    | 0.000636 | 0.016751 | 4.750808081 | 3.1964621 | down  |
| PATH:04630 | Jak-STAT signaling pathway                      | 8       | 90         | 157           | 6719    | 0.001137 | 0.025549 | 3.804104742 | 2.9443802 | down  |
| PATH:04110 | Cell cycle                                      | 7       | 90         | 124           | 6719    | 0.001294 | 0.025549 | 4.214426523 | 2.8881991 | down  |
| PATH:05219 | Bladder cancer                                  | 4       | 90         | 42            | 6719    | 0.002285 | 0.040107 | 7.11005291  | 2.6411908 | down  |
| PATH:05323 | Rheumatoid arthritis                            | 5       | 90         | 88            | 6719    | 0.006311 | 0.099719 | 4.241792929 | 2.199881  | down  |
| PATH:04068 | FoxO signaling pathway                          | 6       | 90         | 133           | 6719    | 0.008603 | 0.123564 | 3.367919799 | 2.0653725 | down  |
| PATH:05200 | Pathways in cancer                              | 10      | 90         | 330           | 6719    | 0.012373 | 0.152813 | 2.262289562 | 1.9075117 | down  |
| PATH:04115 | p53 signaling pathway                           | 4       | 90         | 68            | 6719    | 0.012776 | 0.152813 | 4.391503268 | 1.8935952 | down  |
| PATH:04066 | HIF-1 signaling pathway                         | 5       | 90         | 106           | 6719    | 0.01354  | 0.152813 | 3.52148847  | 1.8683682 | down  |
| PATH:05146 | Amoebiasis                                      | 5       | 90         | 109           | 6719    | 0.015132 | 0.159389 | 3.424566769 | 1.8201088 | down  |
| PATH:04730 | Long-term depression                            | 4       | 90         | 73            | 6719    | 0.016238 | 0.160349 | 4.090715373 | 1.7894711 | down  |
| PATH:05203 | Viral carcinogenesis                            | 7       | 90         | 206           | 6719    | 0.020069 | 0.18652  | 2.536839266 | 1.6974829 | down  |
| PATH:04062 | Chemokine signaling pathway                     | 6       | 90         | 188           | 6719    | 0.039758 | 0.348983 | 2.382624113 | 1.4005809 | down  |
| PATH:04916 | Melanogenesis                                   | 4       | 90         | 101           | 6719    | 0.046047 | 0.382915 | 2.956655666 | 1.3368008 | down  |
| PATH:04621 | NOD-like receptor signaling pathway             | 3       | 90         | 62            | 6719    | 0.0499   | 0.394214 | 3.612365591 | 1.3018955 | down  |
